# Supplementary material
Source: publisher site journal article supplement (https://www.dovepress.com/get_supplementary_file.php?f=supplementary_file_46421.pdf)

## Supplementary Tables and Figures

**Supplementary Table 1** Patients who did or did not stop treatment by variables (new patients; N = 1267)

| Variable                                              |                   | n (%) <sup>a</sup>     |                    |
|-------------------------------------------------------|-------------------|------------------------|--------------------|
|                                                       |                   | Did not stop treatment | Did stop treatment |
| Age at start of treatment                             | n                 | 963                    | 304                |
|                                                       | Mean (SD), years  | 39.8 (9.19)            | 39.4 (9.62)        |
| Sex                                                   | n                 | 963                    | 304                |
|                                                       | Female            | 774 (80)               | 246 (81)           |
|                                                       | Male              | 189 (20)               | 58 (19)            |
| Q1: First time using treatment?                       | n                 | 961                    | 304                |
|                                                       | Yes               | 803 (84)               | 254 (84)           |
|                                                       | No                | 158 (16)               | 50 (16)            |
| Q2: How long was previous treatment?                  | n                 | 141                    | 37                 |
|                                                       | Mean (SD), months | 25.1 (24.80)           | 27.7 (24.16)       |
| Q3: Patient choice to discontinue previous treatment? | n                 | 134                    | 39                 |
|                                                       | Yes               | 85 (63)                | 21 (54)            |
|                                                       | No                | 49 (37)                | 18 (46)            |
| Q4: Clinic given any treatment information?           | n                 | 953                    | 296                |
|                                                       | Yes               | 780 (82)               | 226 (76)           |
|                                                       | No                | 173 (18)               | 70 (24)            |
| Q5: How well informed do you feel?                    | n                 | 961                    | 304                |

## Supplementary Tables and Figures

| Variable                                      |                                         | n (%) <sup>a</sup>     |                    |
|-----------------------------------------------|-----------------------------------------|------------------------|--------------------|
|                                               |                                         | Did not stop treatment | Did stop treatment |
| Q6: Are you looking forward to treatment?     | Extremely                               | 42 (4)                 | 14 (5)             |
|                                               | Not very                                | 111 (12)               | 44 (14)            |
|                                               | OK                                      | 429 (45)               | 114 (38)           |
|                                               | Uninformed                              | 10 (1)                 | 4 (1)              |
|                                               | Very                                    | 369 (38)               | 128 (42)           |
|                                               | n                                       | 953                    | 298                |
|                                               | Extremely                               | 43 (5)                 | 24 (8)             |
| Q7: What is your concern?                     | Moderately                              | 320 (34)               | 88 (30)            |
|                                               | Not at all                              | 141 (15)               | 42 (14)            |
|                                               | Quite a bit                             | 278 (29)               | 90 (30)            |
|                                               | Slightly                                | 171 (18)               | 54 (18)            |
|                                               | n                                       | 499                    | 138                |
|                                               | I am not sure I can inject myself (tiw) | 160 (32)               | 42 (30)            |
|                                               | I am worried about the side effects     | 140 (28)               | 39 (28)            |
| I cannot see the point of the treatment       | 0 (0)                                   | 1 (<1)                 |                    |
| I do not know what to expect of the treatment | 31 (6)                                  | 10 (7)                 |                    |
| It will change my lifestyle                   | 28 (6)                                  | 6 (4)                  |                    |
| It will impact my work                        | 3 (<1)                                  | 4 (3)                  |                    |

## Supplementary Tables and Figures

| Variable                                                                         |                          | n (%) <sup>a</sup>     |                    |
|----------------------------------------------------------------------------------|--------------------------|------------------------|--------------------|
|                                                                                  |                          | Did not stop treatment | Did stop treatment |
| Q18: How have you been since last call (worst patient experience on therapy)?    | No concerns              | 120 (24)               | 31 (22)            |
|                                                                                  | Other                    | 17 (3)                 | 5 (4)              |
|                                                                                  | n                        | 959                    | 306                |
|                                                                                  | Very well                | 3 (<1)                 | 0 (0)              |
|                                                                                  | Well                     | 36 (4)                 | 9 (3)              |
|                                                                                  | OK                       | 641 (67)               | 162 (53)           |
|                                                                                  | Not well                 | 235 (25)               | 116 (38)           |
| Q20: How well informed do you feel (lowest level of information during therapy)? | Very unwell              | 44 (5)                 | 19 (6)             |
|                                                                                  | n                        | 958                    | 304                |
|                                                                                  | Extremely                | 4 (<1)                 | 3 (<1)             |
|                                                                                  | Very                     | 157 (16)               | 70 (23)            |
|                                                                                  | OK                       | 766 (80)               | 214 (70)           |
|                                                                                  | Not very                 | 25 (3)                 | 14 (5)             |
| Q21: Have you contacted any support lines this month?                            | Uninformed               | 6 (<1)                 | 3 (<1)             |
|                                                                                  | n                        | 961                    | 306                |
|                                                                                  | Rebif <sup>®</sup> (yes) | 140 (15)               | 40 (13)            |
|                                                                                  | Rebif <sup>®</sup> (no)  | 821 (85)               | 266 (87)           |
|                                                                                  | MS Society (yes)         | 42 (4)                 | 15 (5)             |

## Supplementary Tables and Figures

| Variable        | n (%) <sup>a</sup>     |                    |
|-----------------|------------------------|--------------------|
|                 | Did not stop treatment | Did stop treatment |
| MS Society (no) | 919 (96)               | 291 (95)           |
| Other (yes)     | 39 (4)                 | 19 (6)             |
| Other (no)      | 922 (96)               | 287 (94)           |

<sup>a</sup>Unless otherwise stated

**Abbreviations:** MS, multiple sclerosis; SD, standard deviation; tiw, three times weekly

## Supplementary Tables and Figures

**Supplementary Table 2** Responses to pre-installation questionnaire (new patients, N = 1267)

| Question                                                                                                     |            | Answer, n (%) <sup>a</sup> |
|--------------------------------------------------------------------------------------------------------------|------------|----------------------------|
| Q1: Is this the first time you will be using a self-injectable treatment for your MS?                        | n          | 1265                       |
|                                                                                                              | Yes        | 1057 (84)                  |
|                                                                                                              | No         | 208 (16)                   |
| Q2: How long was your previous treatment? (in months) (asked if response to question 1 was "no")             | n          | 178                        |
|                                                                                                              | Mean (SD)  | 25.6 (24.63)               |
| Q3: Was it your choice to discontinue previous treatment? (asked if the response to the question 1 was "no") | n          | 173                        |
|                                                                                                              | Yes        | 106 (61)                   |
|                                                                                                              | No         | 67 (39)                    |
| Q4: Has your clinic given you any information about treatment yet?                                           | n          | 1249                       |
|                                                                                                              | Yes        | 1006 (81)                  |
|                                                                                                              | No         | 243 (19)                   |
| Q5: How well informed do you feel?                                                                           | n          | 1265                       |
|                                                                                                              | Extremely  | 56 (4)                     |
|                                                                                                              | Very       | 497 (39)                   |
|                                                                                                              | OK         | 543 (43)                   |
|                                                                                                              | Not very   | 155 (12)                   |
|                                                                                                              | Uninformed | 14 (1)                     |
| Q6: If I was to say are you looking forward to starting your treatment, would you say.....?                  | n          | 1251                       |
|                                                                                                              | Extremely  | 67 (5)                     |

## Supplementary Tables and Figures

| Question                                                                      |                                               | Answer, n (%) <sup>a</sup> |
|-------------------------------------------------------------------------------|-----------------------------------------------|----------------------------|
|                                                                               | Quite a bit                                   | 368 (29)                   |
|                                                                               | Moderately                                    | 408 (33)                   |
|                                                                               | Slightly                                      | 225 (18)                   |
|                                                                               | Not at all                                    | 183 (15)                   |
| Q7: What is your concern? (asked if response to question 6 was "not at all" ) | n                                             | 637                        |
|                                                                               | I am not sure I can inject myself (tiw)       | 202 (32)                   |
|                                                                               | I am worried about the side effects           | 179 (28)                   |
|                                                                               | It will impact my work                        | 7 (1)                      |
|                                                                               | It will change my lifestyle                   | 34 (5)                     |
|                                                                               | I do not know what to expect of the treatment | 41 (6)                     |
|                                                                               | I cannot see the point of the treatment       | 1 (<1)                     |
|                                                                               | No concerns                                   | 151 (24)                   |
|                                                                               | Other                                         | 22 (3)                     |

<sup>a</sup>Unless otherwise stated

**Abbreviations:** MS, multiple sclerosis; SD, standard deviation; tiw, three times weekly

## Supplementary Tables and Figures

**Supplementary Table 3** Responses to post-installation questionnaire (new patients, N = 1267)

| Question                                                                                                             |                            | Answer, n (%) <sup>a</sup> |
|----------------------------------------------------------------------------------------------------------------------|----------------------------|----------------------------|
| Q9: Did your first delivery go to plan and did you receive your Rebit <sup>®</sup> , sharps bin and information bag? | n                          | 1265                       |
|                                                                                                                      | Yes                        | 1257 (>99)                 |
|                                                                                                                      | No                         | 8 (<1)                     |
| Q10: Are you using the injection device?                                                                             | n                          | 1228                       |
|                                                                                                                      | Yes                        | 1127 (92)                  |
|                                                                                                                      | No                         | 101 (8)                    |
| Q11. Did you have any concerns during your training (more than one response is possible)?                            | n                          | 1120                       |
|                                                                                                                      | n <sup>b</sup>             | 1207                       |
|                                                                                                                      | Patient nervousness        | 144 (12)                   |
|                                                                                                                      | Training equipment         | 22 (2)                     |
|                                                                                                                      | Side effects               | 158 (13)                   |
|                                                                                                                      | Carer nervousness          | 4 (<1)                     |
|                                                                                                                      | More painful than expected | 12 (<1)                    |
|                                                                                                                      | Nurse/patient relationship | 1 (<1)                     |
|                                                                                                                      | No concerns                | 818 (68)                   |
|                                                                                                                      | Other                      | 48 (4)                     |
| Q12: Do you feel you have had sufficient training?                                                                   | n                          | 1179                       |
|                                                                                                                      | Yes                        | 1128 (96)                  |
|                                                                                                                      | No                         | 51 (4)                     |

## Supplementary Tables and Figures

| Question                                                 |                                 | Answer, n (%) <sup>a</sup> |
|----------------------------------------------------------|---------------------------------|----------------------------|
| Q13: Will you be injecting yourself?                     | n                               | 1247                       |
|                                                          | Patient                         | 1165 (93)                  |
|                                                          | Carer                           | 35 (3)                     |
|                                                          | Both                            | 45 (4)                     |
|                                                          | Doctor/Nurse                    | 2 (<1)                     |
|                                                          |                                 |                            |
| Q14: Where has most of your information on MS come from? | n                               | 1238                       |
|                                                          | Patient support groups          | 70 (6)                     |
|                                                          | Rebif <sup>®</sup> support line | 10 (<1)                    |
|                                                          | General practitioner            | 15 (1)                     |
|                                                          | Internet                        | 254 (21)                   |
|                                                          | Hospital                        | 766 (62)                   |
|                                                          | Clinovia information            | 67 (5)                     |
|                                                          | Other                           | 56 (5)                     |
| Q15: Did you receive any training?                       | n                               | 1225                       |
|                                                          | Yes                             | 1149 (94)                  |
|                                                          | No                              | 73 (6)                     |
|                                                          | Training declined               | 3 (<1)                     |
| Q16: How did you receive your training?                  | n                               | 1192                       |
|                                                          | Hospital                        | 1018 (85)                  |
|                                                          | Clinovia MS Nurse               | 174 (15)                   |



## Supplementary Tables and Figures

---

| Question                                           | Answer, n (%) <sup>a</sup> |
|----------------------------------------------------|----------------------------|
| Q17: What made you decide to begin your treatment? | n 1232                     |
|                                                    | Peer pressure 42 (3)       |
|                                                    | Personal choice 918 (75)   |
|                                                    | No choice 272 (22)         |

---

<sup>a</sup>Unless otherwise stated

<sup>b</sup>Total number of responses given as multiple responses were allowed

**Abbreviations:** MS, multiple sclerosis

## Supplementary Tables and Figures

**Supplementary Table 4** Responses to pre-delivery questionnaire by time period (new patients, N = 1267)

| 0 - 6 months (n=1251) | Q18: How have you been since you last call? Would you say you have been? | n*          | 3017       |
|-----------------------|--------------------------------------------------------------------------|-------------|------------|
|                       |                                                                          | Very well   | 126 (4%)   |
|                       |                                                                          | Well        | 600 (20%)  |
|                       |                                                                          | OK          | 2007 (67%) |
|                       |                                                                          | Not well    | 255 (8%)   |
|                       |                                                                          | Very unwell | 29 (<1%)   |
|                       |                                                                          |             |            |
|                       | Q19: Have you been in contact with the clinic since our last call?       | n*          | 2993       |
|                       |                                                                          | Yes         | 1024 (34%) |
|                       |                                                                          | No          | 1969 (66%) |
|                       |                                                                          |             |            |
|                       | Q20: How well informed do you feel?                                      | n*          | 3004       |
|                       |                                                                          | Extremely   | 162 (5%)   |
|                       |                                                                          | Very        | 1602 (53%) |
|                       |                                                                          | OK          | 1213 (40%) |
|                       |                                                                          | Not very    | 24 (<1%)   |
|                       |                                                                          | Uninformed  | 3 (<1%)    |
|                       |                                                                          |             |            |

## Supplementary Tables and Figures

| 0 - 6 months (n=1251)                         | Q21: Have you contacted any support lines this month?                           | n*                          | 3012       |
|-----------------------------------------------|---------------------------------------------------------------------------------|-----------------------------|------------|
|                                               |                                                                                 | Rebif                       | 123 (4%)   |
|                                               |                                                                                 | MS Society                  | 33 (1%)    |
|                                               |                                                                                 | Other                       | 30 (<1%)   |
|                                               |                                                                                 | No                          | 2826 (94%) |
|                                               |                                                                                 |                             |            |
|                                               | Q22: Have you found taking your treatment this month?                           | n*                          | 3016       |
|                                               |                                                                                 | Very good                   | 125 (4%)   |
|                                               |                                                                                 | Good                        | 604 (20%)  |
|                                               |                                                                                 | OK                          | 2134 (71%) |
|                                               |                                                                                 | Poor                        | 143 (5%)   |
|                                               |                                                                                 | Very poor                   | 10 (<1%)   |
|                                               |                                                                                 |                             |            |
|                                               | Q23: If the answer to TAKING question is Poor/Very poor: What was your concern? | n*                          | 91         |
|                                               |                                                                                 | Difficulty with injections  | 42 (46%)   |
|                                               |                                                                                 | It is changing my lifestyle | 10 (11%)   |
| I do not know what to expect of the treatment |                                                                                 | 1 (1%)                      |            |
| I cannot see the point of the treatment       |                                                                                 | 1 (1%)                      |            |

## Supplementary Tables and Figures

| 0 - 6 months (n=1251)      | Q23: If the answer to TAKING question is Poor/Very poor: What was your concern?       | Other        | 37 (41%)   |
|----------------------------|---------------------------------------------------------------------------------------|--------------|------------|
|                            |                                                                                       |              |            |
|                            | Q24: If answer to clinic question is Yes: Was this by phone or a visit to the clinic? | n*           | 966        |
|                            |                                                                                       | Phone        | 325 (34%)  |
|                            |                                                                                       | Clinic visit | 641 (66%)  |
|                            |                                                                                       |              |            |
|                            | Q45: Did you last delivery go to plan                                                 | n*           | 3019       |
|                            |                                                                                       | Yes          | 2959 (98%) |
|                            |                                                                                       | No           | 60 (2%)    |
|                            |                                                                                       |              |            |
| 6 months - 1 year (n=1010) | Q18: How have you been since you last call? Would you say you have been?              | n*           | 3008       |
|                            |                                                                                       | Very well    | 150 (5%)   |
|                            |                                                                                       | Well         | 651 (22%)  |
|                            |                                                                                       | OK           | 2038 (68%) |
|                            |                                                                                       | Not well     | 157 (5%)   |
|                            |                                                                                       | Very unwell  | 12 (<1%)   |
|                            |                                                                                       |              |            |

## Supplementary Tables and Figures

| 6 months - 1 year (n=1010) | Q19: Have you been in contact with the clinic since our last call? | n*         | 2963       |
|----------------------------|--------------------------------------------------------------------|------------|------------|
|                            |                                                                    | Yes        | 670 (23%)  |
|                            |                                                                    | No         | 2293 (77%) |
|                            |                                                                    |            |            |
|                            | Q20: How well informed do you feel?                                | n*         | 2979       |
|                            |                                                                    | Extremely  | 136 (5%)   |
|                            |                                                                    | Very       | 1620 (54%) |
|                            |                                                                    | OK         | 1205 (40%) |
|                            |                                                                    | Not very   | 15 (<1%)   |
|                            |                                                                    | Uninformed | 3 (<1%)    |
|                            |                                                                    |            |            |
|                            | Q21: Have you contacted any support lines this month?              | n*         | 3000       |
|                            |                                                                    | Rebif      | 56 (2%)    |
|                            |                                                                    | MS Society | 19 (<1%)   |
|                            |                                                                    | Other      | 17 (<1%)   |
| No                         |                                                                    | 2908 (97%) |            |
|                            |                                                                    |            |            |

## Supplementary Tables and Figures

| 6 months - 1 year (n=1010) | Q22: Have you found taking your treatment this month?                           | n*                                            | 3004       |
|----------------------------|---------------------------------------------------------------------------------|-----------------------------------------------|------------|
|                            |                                                                                 | Very good                                     | 119 (4%)   |
|                            |                                                                                 | Good                                          | 648 (22%)  |
|                            |                                                                                 | OK                                            | 2142 (71%) |
|                            |                                                                                 | Poor                                          | 81 (3%)    |
|                            |                                                                                 | Very poor                                     | 14 (<1%)   |
|                            |                                                                                 |                                               |            |
|                            | Q23: If the answer to TAKING question is Poor/Very poor: What was your concern? | n*                                            | 61         |
|                            |                                                                                 | Difficulty with injections                    | 41 (67%)   |
|                            |                                                                                 | It is changing my lifestyle                   | 1 (2%)     |
|                            |                                                                                 | I do not know what to expect of the treatment | 1 (2%)     |
|                            |                                                                                 | I cannot see the point of the treatment       | 1 (2%)     |
|                            |                                                                                 | Other                                         | 17 (28%)   |
|                            |                                                                                 |                                               |            |

## Supplementary Tables and Figures

| 6 months - 1 year (n=1010) | Q24: If answer to clinic question is Yes: Was this by phone or a visit to the clinic? | n*           | 656        |
|----------------------------|---------------------------------------------------------------------------------------|--------------|------------|
|                            |                                                                                       | Phone        | 163 (25%)  |
|                            |                                                                                       | Clinic visit | 493 (75%)  |
|                            | Q45: Did you last delivery go to plan                                                 | n*           | 2990       |
|                            |                                                                                       | Yes          | 2948 (99%) |
|                            |                                                                                       | No           | 42 (1%)    |
| 1 - 2years (n=793)         | Q18: How have you been since you last call? Would you say you have been?              | n*           | 3755       |
|                            |                                                                                       | Very well    | 159 (4%)   |
|                            |                                                                                       | Well         | 811 (22%)  |
|                            |                                                                                       | OK           | 2582 (69%) |
|                            |                                                                                       | Not well     | 180 (5%)   |
|                            |                                                                                       | Very unwell  | 23 (<1%)   |
|                            |                                                                                       |              |            |

## Supplementary Tables and Figures

| 1 - 2years (n=793) | Q19: Have you been in contact with the clinic since our last call? | n*         | 3738       |
|--------------------|--------------------------------------------------------------------|------------|------------|
|                    |                                                                    | Yes        | 736 (20%)  |
|                    |                                                                    | No         | 3002 (80%) |
|                    |                                                                    |            |            |
|                    | Q20: How well informed do you feel?                                | n*         | 3734       |
|                    |                                                                    | Extremely  | 140 (4%)   |
|                    |                                                                    | Very       | 2109 (56%) |
|                    |                                                                    | OK         | 1469 (39%) |
|                    |                                                                    | Not very   | 12 (<1%)   |
|                    |                                                                    | Uninformed | 4 (<1%)    |
|                    |                                                                    |            |            |
|                    | Q21: Have you contacted any support lines this month?              | n*         | 3748       |
|                    |                                                                    | Rebif      | 50 (1%)    |
|                    |                                                                    | MS Society | 17 (<1%)   |
|                    |                                                                    | Other      | 25 (<1%)   |
| No                 |                                                                    | 3656 (98%) |            |
|                    |                                                                    |            |            |



## Supplementary Tables and Figures

| 1 - 2years (n=793) | Q22: Have you found taking your treatment this month?                           | n*                                      | 3756       |
|--------------------|---------------------------------------------------------------------------------|-----------------------------------------|------------|
|                    |                                                                                 | Very good                               | 129 (3%)   |
|                    |                                                                                 | Good                                    | 783 (21%)  |
|                    |                                                                                 | OK                                      | 2764 (74%) |
|                    |                                                                                 | Poor                                    | 70 (2%)    |
|                    |                                                                                 | Very poor                               | 10 (<1%)   |
|                    |                                                                                 |                                         |            |
|                    | Q23: If the answer to TAKING question is Poor/Very poor: What was your concern? | n*                                      | 53         |
|                    |                                                                                 | Difficulty with injections              | 23 (43%)   |
|                    |                                                                                 | It is changing my lifestyle             | 2 (4%)     |
|                    |                                                                                 | I cannot see the point of the treatment | 1 (2%)     |
|                    |                                                                                 | Other                                   | 27 (51%)   |
|                    |                                                                                 |                                         |            |

## Supplementary Tables and Figures

| 1 - 2years (n=793) | Q24: If answer to clinic question is Yes: Was this by phone or a visit to the clinic? | n*           | 687        |
|--------------------|---------------------------------------------------------------------------------------|--------------|------------|
|                    |                                                                                       | Phone        | 182 (26%)  |
|                    |                                                                                       | Clinic visit | 505 (74%)  |
|                    | Q45: Did you last delivery go to plan                                                 | n*           | 3742       |
|                    |                                                                                       | Yes          | 3698 (99%) |
|                    |                                                                                       | No           | 44 (1%)    |
| 2 years+ (n=356)   | Q18: How have you been since you last call? Would you say you have been?              | n*           | 1770       |
|                    |                                                                                       | Very well    | 70 (4%)    |
|                    |                                                                                       | Well         | 353 (20%)  |
|                    |                                                                                       | OK           | 1283 (72%) |
|                    |                                                                                       | Not well     | 54 (3%)    |
|                    |                                                                                       | Very unwell  | 10 (<1%)   |
|                    |                                                                                       |              |            |

## Supplementary Tables and Figures

| 2 years+ (n=356) | Q19: Have you been in contact with the clinic since our last call? | n*         | 1758       |
|------------------|--------------------------------------------------------------------|------------|------------|
|                  |                                                                    | Yes        | 243 (14%)  |
|                  |                                                                    | No         | 1515 (86%) |
|                  |                                                                    |            |            |
|                  | Q20: How well informed do you feel?                                | n*         | 1755       |
|                  |                                                                    | Extremely  | 72 (4%)    |
|                  |                                                                    | Very       | 1025 (58%) |
|                  |                                                                    | OK         | 656 (37%)  |
|                  |                                                                    | Not very   | 2 (<1%)    |
|                  |                                                                    |            |            |
|                  | Q21: Have you contacted any support lines this month?              | n*         | 1765       |
|                  |                                                                    | Rebif      | 19 (1%)    |
|                  |                                                                    | MS Society | 3 (<1%)    |
|                  |                                                                    | Other      | 4 (<1%)    |
|                  |                                                                    | No         | 1739 (99%) |
|                  |                                                                    |            |            |

## Supplementary Tables and Figures

| 2 years+ (n=356) | Q22: Have you found taking your treatment this month?                                 | n*                                      | 1771        |
|------------------|---------------------------------------------------------------------------------------|-----------------------------------------|-------------|
|                  |                                                                                       | Very good                               | 55 (3%)     |
|                  |                                                                                       | Good                                    | 349 (20%)   |
|                  |                                                                                       | OK                                      | 1328 (75%)  |
|                  |                                                                                       | Poor                                    | 36 (2%)     |
|                  |                                                                                       | Very poor                               | 3 (<1%)     |
|                  |                                                                                       |                                         |             |
|                  | Q23: If the answer to TAKING question is Poor/Very poor: What was your concern?       | n*                                      | 18          |
|                  |                                                                                       | Difficulty with injections              | 9 (50%)     |
|                  |                                                                                       | I cannot see the point of the treatment | 1 (6%)      |
|                  |                                                                                       | Other                                   | 8 (44%)     |
|                  |                                                                                       |                                         |             |
|                  | Q24: If answer to clinic question is Yes: Was this by phone or a visit to the clinic? | n*                                      | 234         |
| Phone            |                                                                                       | 51 (22%)                                |             |
| Clinic visit     |                                                                                       | 183 (78%)                               |             |
|                  |                                                                                       |                                         |             |
|                  |                                                                                       |                                         |             |
| 2 years+ (n=356) | Q45: Did you last delivery go to plan                                                 | n*                                      | 1765        |
|                  |                                                                                       | Yes                                     | 1750 (>99%) |
|                  |                                                                                       | No                                      | 15 (<1%)    |
|                  |                                                                                       |                                         |             |

## Supplementary Tables and Figures

**Supplementary Table 5** Responses to ended treatment questionnaire (new patients, N = 1267)

| Question                                                                                        |                                       | Answer, n (%) <sup>a</sup> |
|-------------------------------------------------------------------------------------------------|---------------------------------------|----------------------------|
| Q25: What was your reason for stopping?                                                         | n                                     | 300                        |
|                                                                                                 | n <sup>b</sup>                        | 355                        |
|                                                                                                 | It impacted my work                   | 1 (<1)                     |
|                                                                                                 | It changed my lifestyle               | 14 (4)                     |
|                                                                                                 | Switched drug                         | 73 (21)                    |
|                                                                                                 | Needle phobic                         | 1 (<1)                     |
|                                                                                                 | Side effects                          | 100 (28)                   |
|                                                                                                 | I became disillusioned with treatment | 18 (5)                     |
|                                                                                                 | Injection-site issues                 | 27 (8)                     |
|                                                                                                 | Hospital                              | 78 (22)                    |
|                                                                                                 | Other                                 | 43 (12)                    |
| Q26: Is there anything about sc IFN $\beta$ -1a you would change that may benefit new patients? | n                                     | 211                        |
|                                                                                                 | n <sup>b</sup>                        | 261                        |
|                                                                                                 | Better information                    | 3 (1)                      |
|                                                                                                 | Did not meet expectations             | 13 (5)                     |
|                                                                                                 | Reduced side effects                  | 124 (48)                   |
|                                                                                                 | Reduce frequency of injections        | 20 (8)                     |
|                                                                                                 | Improved injection device             | 6 (2)                      |
|                                                                                                 | Reduced injection-site issues         | 50 (19)                    |

## Supplementary Tables and Figures

| Question                                                      | Answer, n (%) <sup>a</sup>                  |          |
|---------------------------------------------------------------|---------------------------------------------|----------|
| Q27: Did you contact any support lines during your treatment? | Easier access to doctor and ongoing support | 6 (2)    |
|                                                               | Other                                       | 39 (15)  |
|                                                               | n                                           | 264      |
|                                                               | n <sup>b</sup>                              | 311      |
|                                                               | Rebif <sup>®</sup>                          | 78 (25)  |
|                                                               | MS Society                                  | 16 (5)   |
|                                                               | Clinovia                                    | 63 (20)  |
|                                                               | Not at all                                  | 108 (35) |
|                                                               | Other                                       | 46 (15)  |

<sup>a</sup>Unless otherwise stated

<sup>b</sup>Total number of responses given as multiple responses were allowed

**Abbreviations:** IFN, interferon; MS, multiple sclerosis; sc, subcutaneous

## Supplementary Tables and Figures

**Supplementary Figure 1A** Kaplan–Meier curves of time to stop treatment, by degree that patients were looking forward to therapy (new patient population)

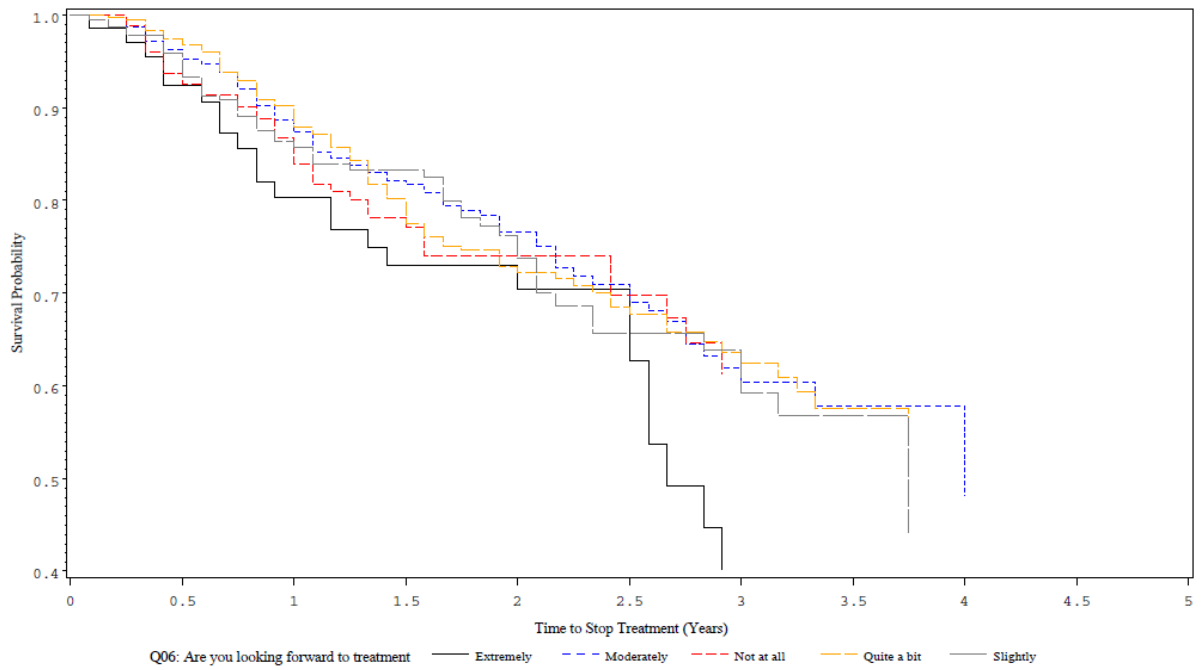

## Supplementary Tables and Figures

**Supplementary Figure 1B** Kaplan–Meier curves of time to stop treatment, by gender (new patient population)

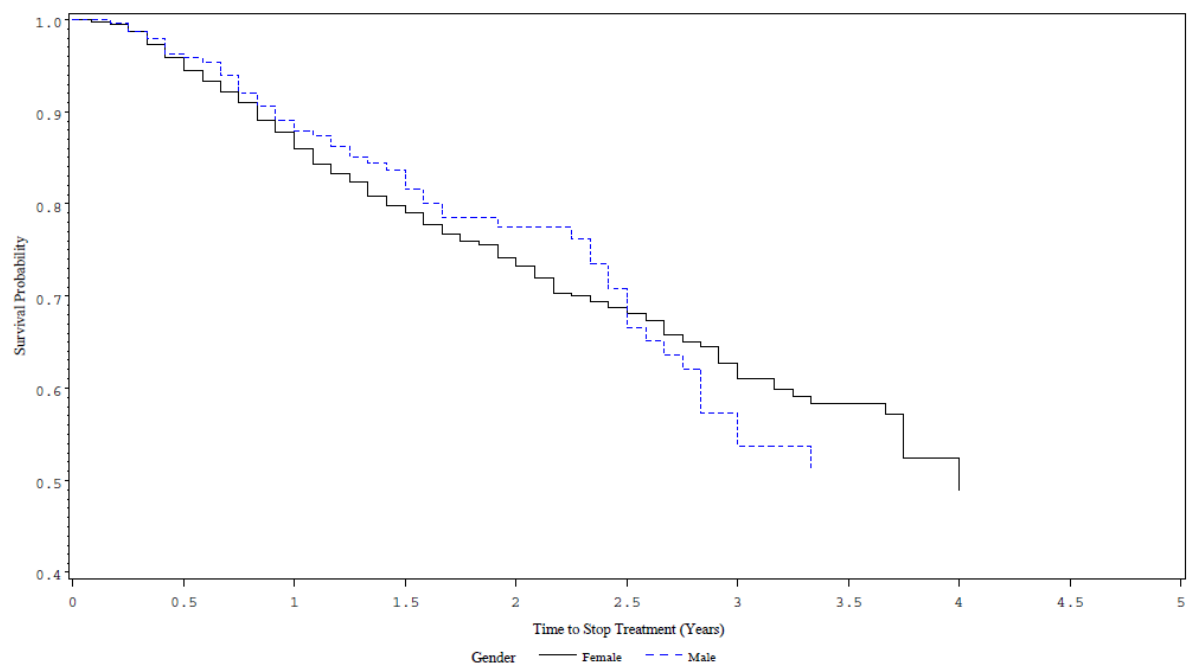



## Supplementary Tables and Figures

**Supplementary Figure 1C** Kaplan–Meier curves of time to stop treatment, by use of previous disease-modifying drug (new patient population)

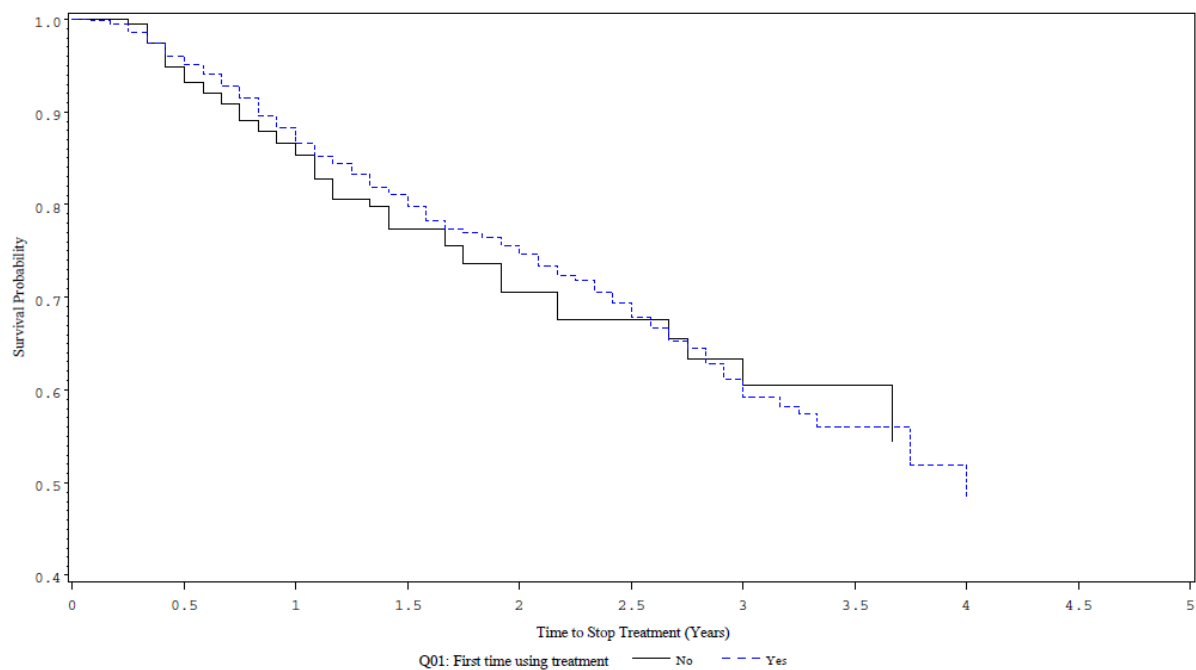

## Supplementary Tables and Figures

**Supplementary Figure 1D** Kaplan–Meier curves of time to stop treatment, by patients' decision to discontinue the previous treatment (patients who had used a previous disease-modifying drug in the new patient population)

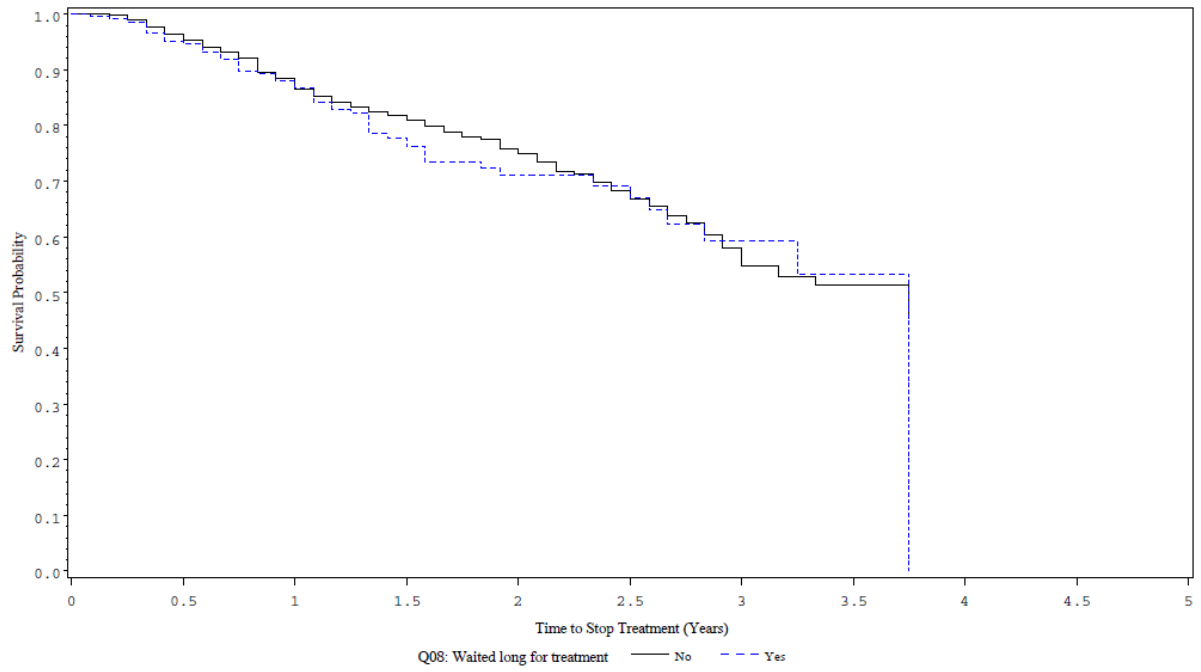

## Supplementary Tables and Figures

**Supplementary Figure 1E** Kaplan–Meier curves of time to stop treatment, by level of information during therapy (new patient population)

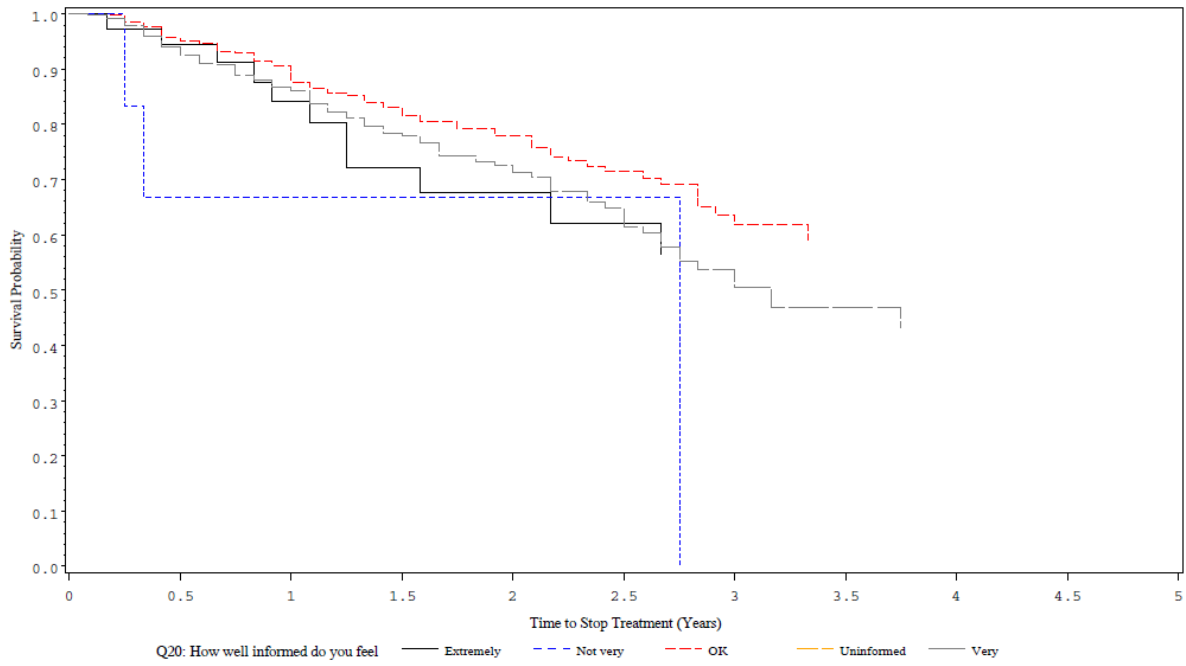

# Supplementary Tables and Figures

Supplementary Figure 1F Kaplan–Meier curves of time to stop treatment, by region (new patient population)

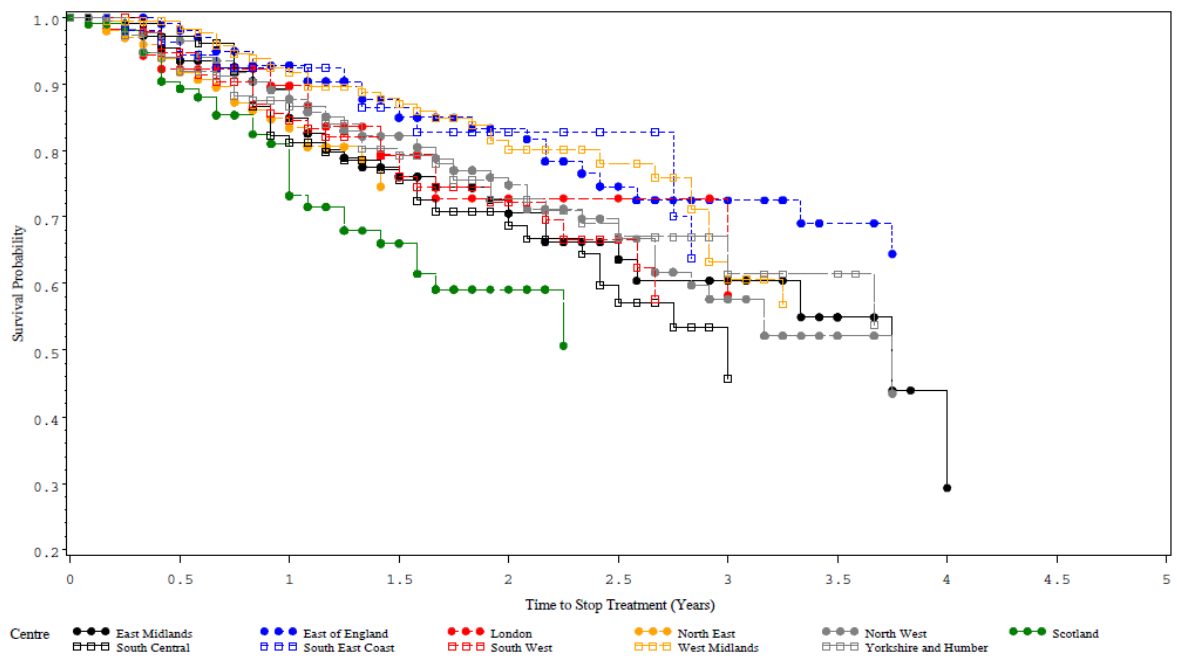

## Supplementary Tables and Figures

**Supplementary Figure 2A** Kaplan–Meier curves of time to stop treatment, by deprivation score (new patient population, England)

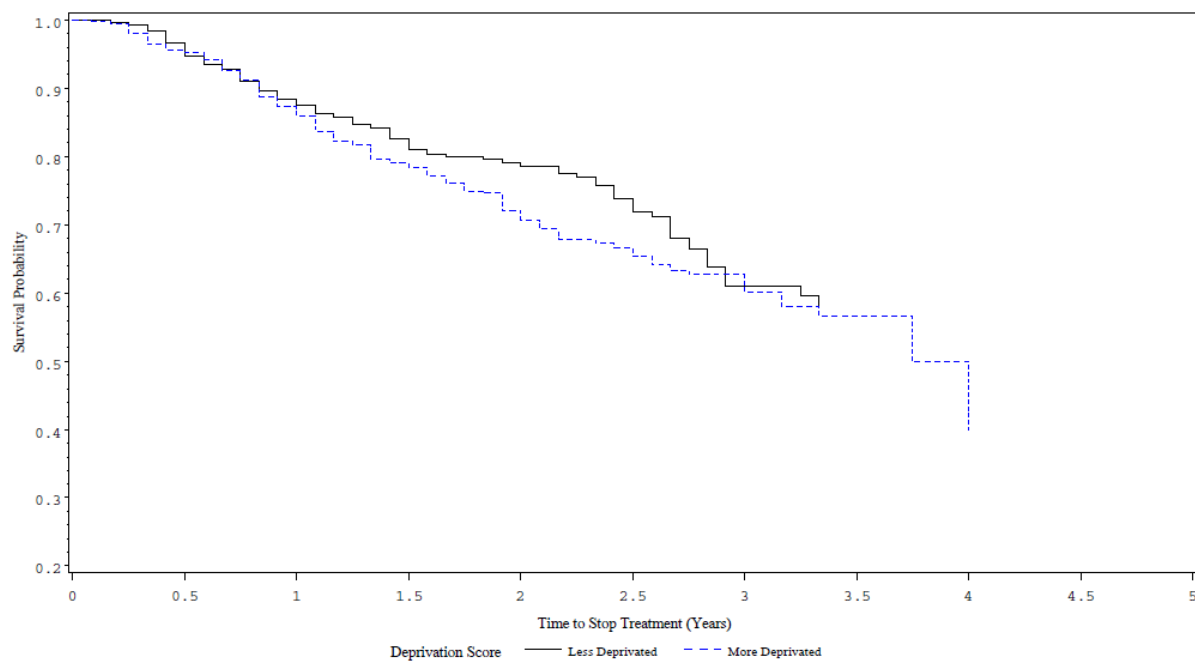

## Supplementary Tables and Figures

**Supplementary Figure 2B** Kaplan–Meier curves of time to stop treatment, by deprivation score (new patient population, Wales)

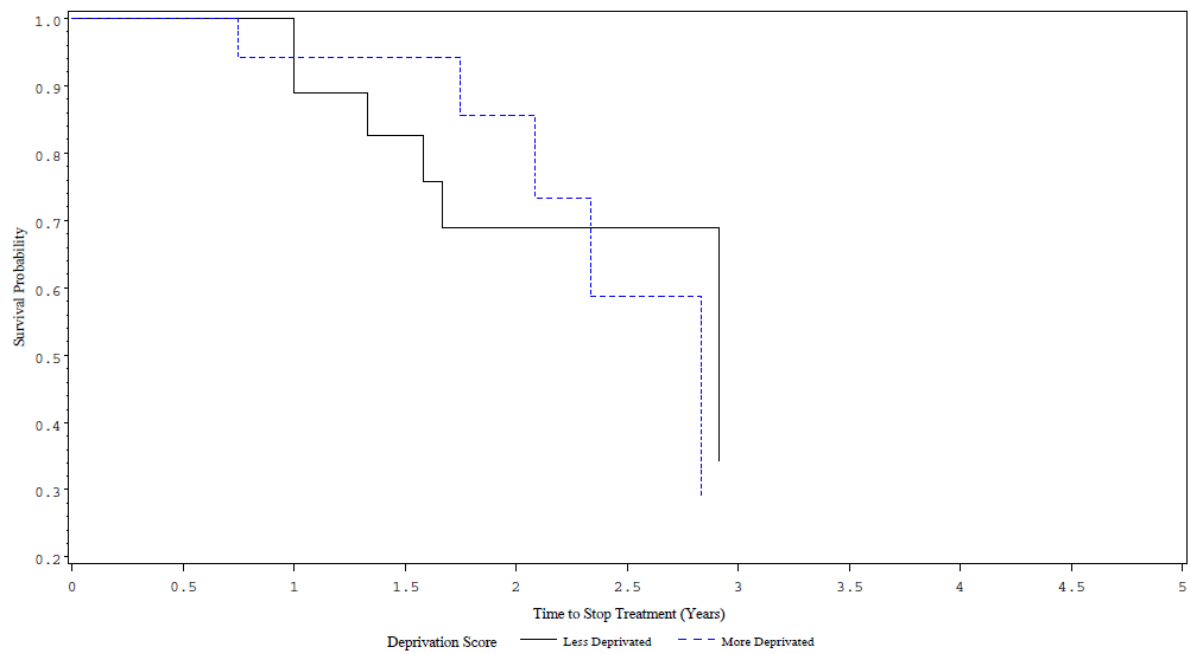

## Supplementary Tables and Figures

**Supplementary Figure 2C** Kaplan–Meier curves of time to stop treatment, by deprivation score (new patient population, Scotland)

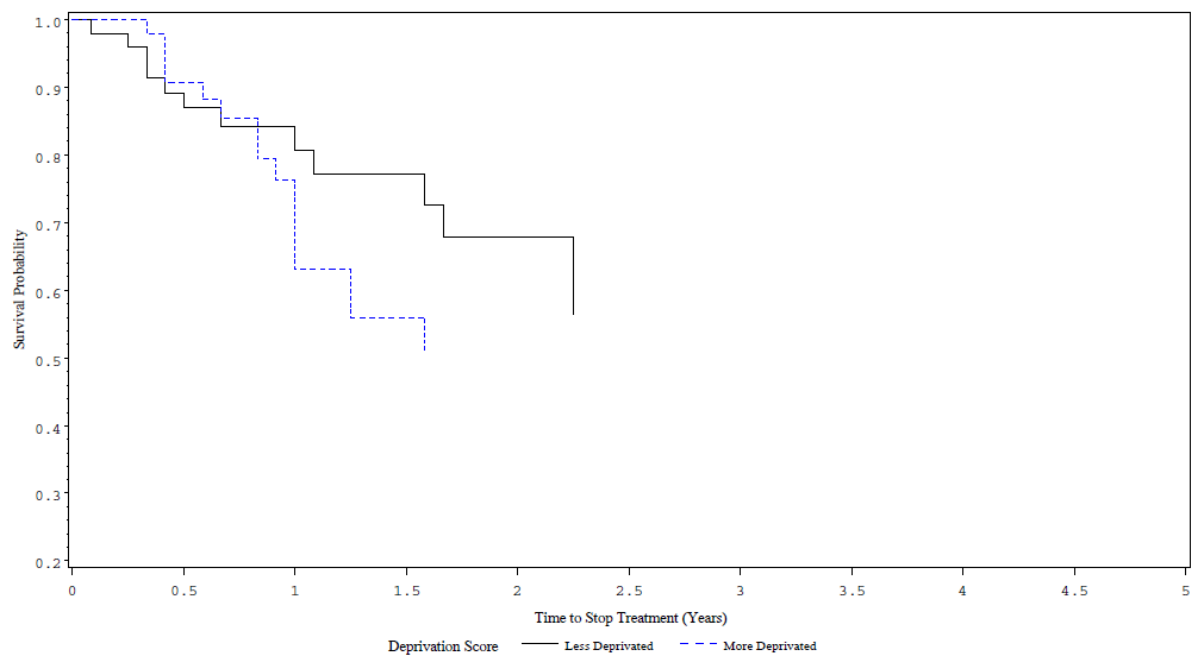

Supplement: Supplementary file 1 [file get_supplementary_file.php]
